# Supplementary material for: Essential effect of the electrolyte on the mechanical and chemical degradation of LiNi0.8Co0.15Al0.05O2 cathodes upon long-term cycling
Source: Royal Society of Chemistry journal article supplement (doi:10.1039/d0ta07814j), 2021-01-01
Supplement: d0ta07814j1.pdf [file d0ta07814j1.pdf]

## Supporting Information

### **Essential Effect of the Electrolyte on the Mechanical and Chemical Degradation of $\text{LiNi}_{0.8}\text{Co}_{0.15}\text{Al}_{0.05}\text{O}_2$ Cathodes upon Long-Term Cycling**

Xiaoming Liu,<sup>1,#</sup> Xiaowen Zhan,<sup>1,2,#</sup> Zachary D. Hood,<sup>3,#</sup> Wangda Li,<sup>4</sup> Donovan N. Leonard<sup>5</sup>,  
Arumugam Manthiram,<sup>4</sup> Miaofang Chi<sup>1,\*</sup>

<sup>1</sup> Center for Nanophase Materials Sciences, Oak Ridge National Laboratory, Oak Ridge, TN 37831, USA

<sup>2</sup> Department of Chemical and Materials Engineering, University of Kentucky, Lexington, Kentucky 40506, USA

<sup>3</sup> Applied Materials Division, Argonne National Laboratory, Lemont, IL, 60439, USA

<sup>4</sup> Materials Science and Engineering Program and Texas Materials Institute, The University of Texas at Austin, Austin, TX 78712, USA

<sup>5</sup> Materials Science and Technology Division, Oak Ridge National Laboratory, Oak Ridge, TN 37831, USA

# Equal contribution

\* Correspondence to: [chim@ornl.gov](mailto:chim@ornl.gov)

Supplementary Figures:

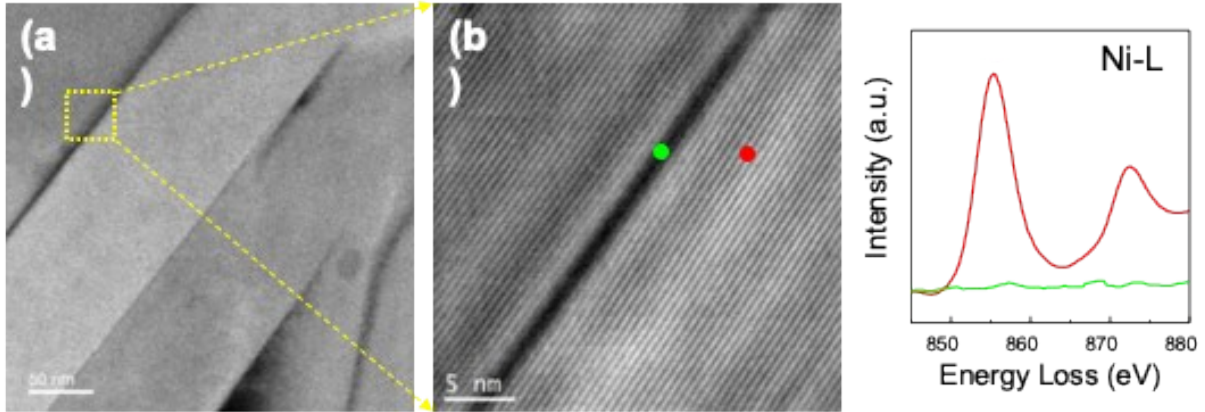

**Figure S1.** (a-b) HAADF-STEM images acquired at some loosely contacted grains in the pristine NCA secondary particle shown in Figure 1a. The inset of panel b shows Ni L-edge EELS spectra obtained at the two points indicated.

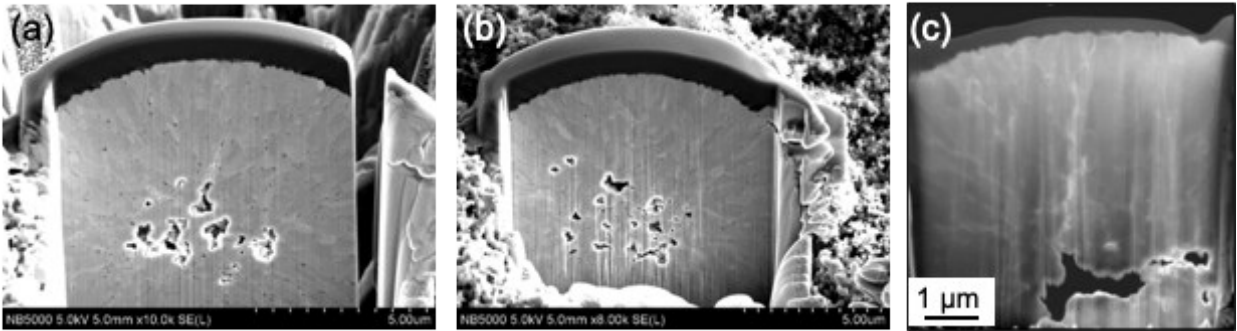

**Figure S2.** (a-c) SEM images of the cross-section in a secondary NCA particle after long-term cycling.

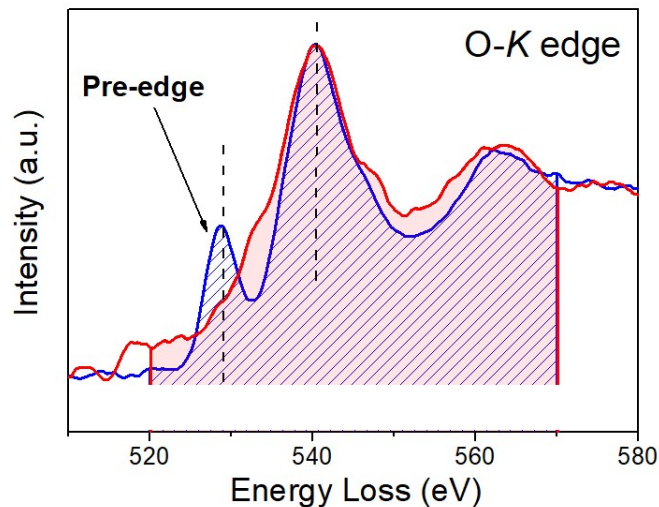

**Figure S3.** Integration of the O-*K* edge between 520 and 570 eV at surface (red shadow) and bulk (blue shadow) after the spectra were normalized to the total intensity of signal between 510-950eV.

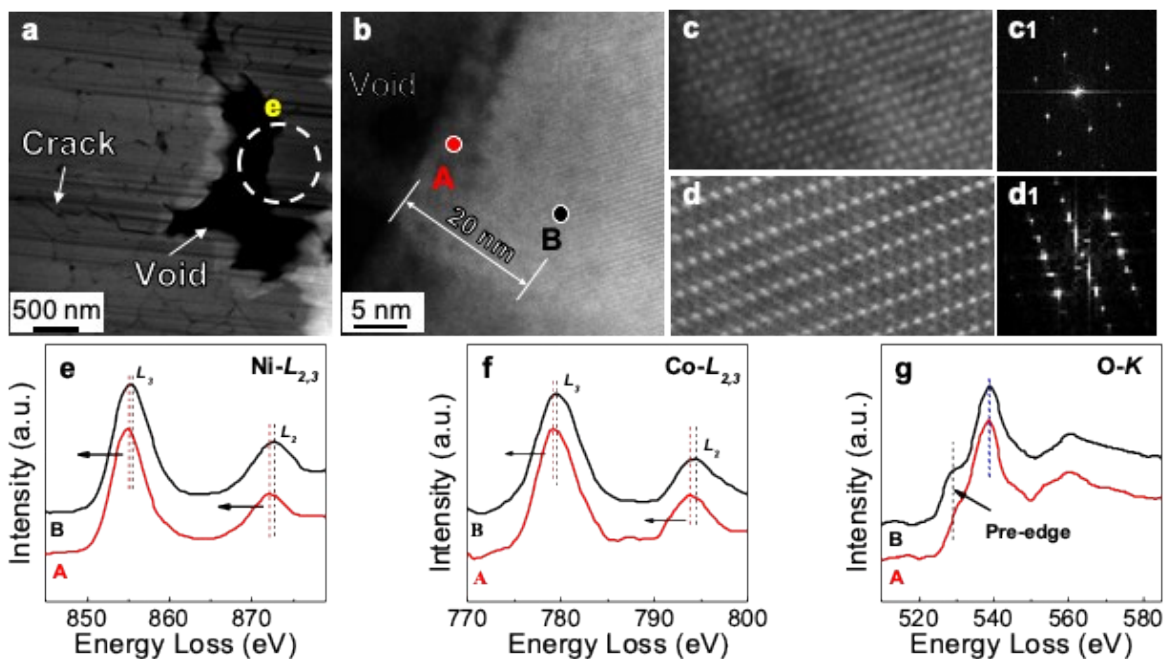

**Figure S4.** HAADF-STEM images and EELS spectra of cycled NCA. (a) A void in the center of the secondary particle. (b) A close examination of the circled area in panel a. (c-d) High-resolution STEM images and FFT patterns of the highlighted points in panel b. EELS spectra of Ni *L*-edge (e), Co *L*-edge (f), and O *K*-edge (g) at the bulk (B) and reconstruction layer (A) of the particle near the void.
